# Supplementary material for: Impact of the Age of Cecal Material Transfer Donors on Alzheimer’s Disease Pathology in 5xFAD Mice
Source: MDPI journal article supplement (doi:10.3390/microorganisms9122548), 2021-12-09
Supplement: s1 [file s1]

|                | <b>Littersize</b> |           | <b>n</b> | <b>sex ratio</b> |           |
|----------------|-------------------|-----------|----------|------------------|-----------|
|                | <b>mean</b>       | <b>SD</b> |          | <b>mean</b>      | <b>SD</b> |
| <b>control</b> | 6,10              | 2,34      | 21       | 1,38             | 1,31      |
| <b>ABX</b>     | 7,57*             | 1,78      | 21       | 1,58             | 1,00      |

**Supplementary Table S1: Litter characteristics**

Litters from antibiotic-treated and control dams giving birth in the same period were compared. While sex ratio is indifferent, the size of the litters from antibiotics-treated dams (ABX) was even elevated (unpaired t-test, \*p=0.027).

|           | Saturday                                                                                                 | Sunday                                                                                                   | Monday                                                                                             | Tuesday                                                                                            | Wednesday                                                                                                  | Thursday                                                                                                  | Friday                                                                                                     |
|-----------|----------------------------------------------------------------------------------------------------------|----------------------------------------------------------------------------------------------------------|----------------------------------------------------------------------------------------------------|----------------------------------------------------------------------------------------------------|------------------------------------------------------------------------------------------------------------|-----------------------------------------------------------------------------------------------------------|------------------------------------------------------------------------------------------------------------|
| Morning   |                                                                                                          |                                                                                                          | <u>T-maze</u><br>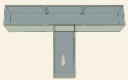 | <u>T-maze</u><br> | <u>T-maze</u><br>         |                                                                                                           | <u>Nesting test</u><br> |
|           |                                                                                                          |                                                                                                          | Habituation<br>(2 min)                                                                             | Trial 1<br>(Right or left choice)                                                                  | Trial 2<br>(Right or left choice)                                                                          |                                                                                                           | Nesting Evaluation                                                                                         |
| Time      |                                                                                                          |                                                                                                          | 9:30 AM                                                                                            | 9:30 AM                                                                                            | 9:30 AM                                                                                                    |                                                                                                           | 9:00 AM                                                                                                    |
| Afternoon | <u>Nesting test</u><br> | <u>Nesting test</u><br> | <u>RAWM</u><br>   |                                                                                                    | <u>Neophobia test</u><br> | <u>Nesting test</u><br> | <u>Nesting test</u><br> |
|           | Nesting material +<br>paper towel                                                                        | Nesting material<br>(only)                                                                               | Alternation of visible<br>and invisible platform                                                   |                                                                                                    | Time to escape<br>from the box (s)                                                                         | No nesting material +<br>No paper towel                                                                   | Nesting material<br>(only)                                                                                 |
| Time      | 5:00 PM                                                                                                  | 5:00 PM                                                                                                  | 1:30 PM                                                                                            |                                                                                                    | 3:30 PM      5:00 PM                                                                                       | 5:00 PM                                                                                                   |                                                                                                            |

**Supplementary Figure S1: Schedule for behavioral testing**

Mice were tested within one week before sacrifice as indicated in Figure 1. Starting times for each test are indicated in the scheme.

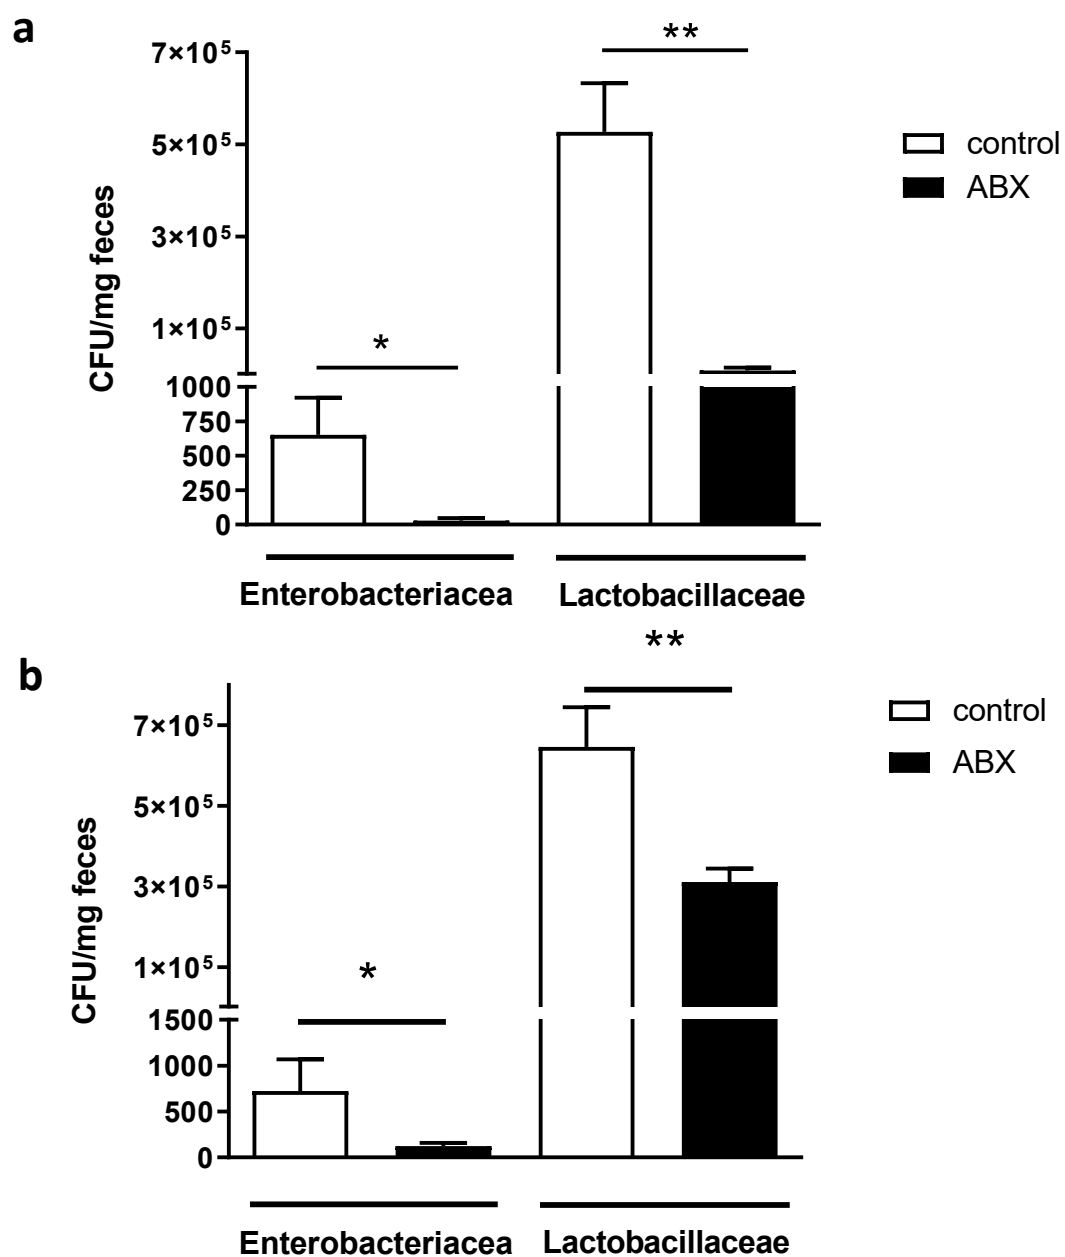

### Supplementary Figure S2: Antibiotics treatment of mothers and offspring

Suspended and diluted fecal material from dams (a, n=9 per group) or offspring (aged 4 weeks) was subjected to specific bacterial growth plates and colony forming units (CFU) counted after 24 h of incubation. Animals were either treated with antibiotics (ABX, n=38) or with normal drinking water without supplements (control, n=18).

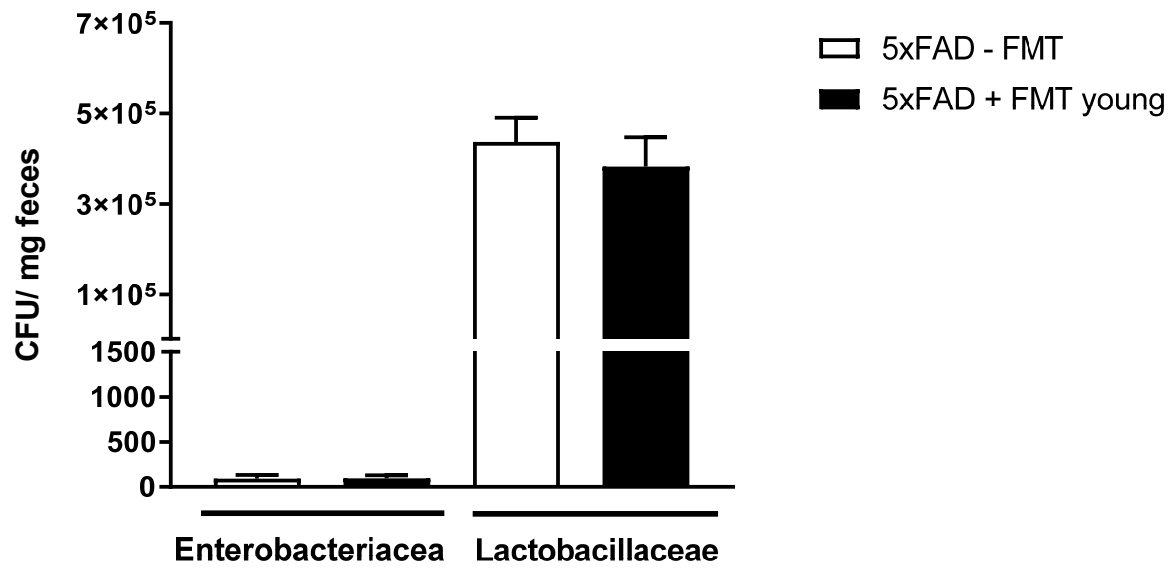

**Supplementary Figure S3: Comparison of CFU from 5xFAD with and without age-matched FMT**

Suspended and diluted fecal material was analyzed as described and colony forming units (CFU) counted after 24 h of incubation. Animals were either treated with PBS (-FMT, n=15) or with cecal material from age-matched (young donors) (+FMT young, n=20). Data are presented as mean + SEM.

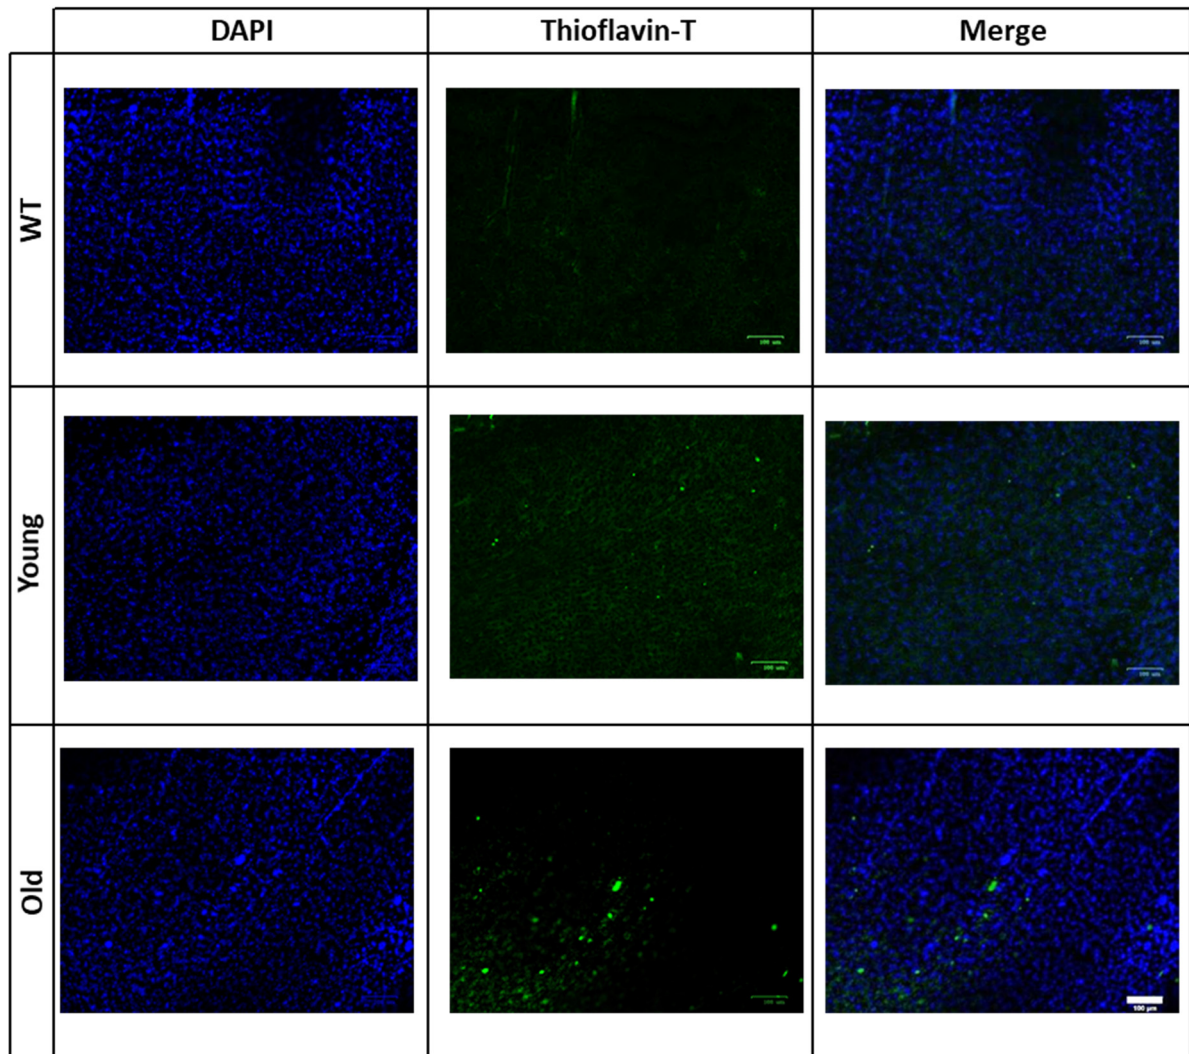

**Supplementary Figure S4: Prefrontal cortex slice as an example for Thioflavin-T staining**

Slices from prefrontal cortex (PFC) from wild type (wt) animals or 5xFAD mice receiving fecal material from young (designated “young”) or old donors (designated “old”) were stained with Thioflavin-T (ThT) for A $\beta$  aggregates and DAPI for neuronal nuclei labeling. Exemplary pictures and the merge of both signals are shown. Scale bar: 100  $\mu$ m.
